# Supplementary material for: Phase IIa, placebo-controlled, randomised study of lutikizumab, an anti-interleukin-1α and anti-interleukin-1β dual variable domain immunoglobulin, in patients with erosive hand osteoarthritis
Source: PubMed Central journal article supplement — Ann Rheum Dis. 2018 Dec 14;78(3):413–20. doi: 10.1136/annrheumdis-2018-213336 (PMC6390132; doi:10.1136/annrheumdis-2018-213336), 2018-12-14
Supplement: annrheumdis-2018-213336supp007.pdf [file annrheumdis-2018-213336supp007.pdf]

**Supplemental Table 4. Change From Baseline to Week 26 in Scores for Other Efficacy Endpoints (observed cases)**

| Endpoint (Full Scale)                                           | Placebo |                     | Lutikizumab |                     | LS Mean Difference<br>(95% CI)<br>Lutikizumab vs<br>Placebo* | P Value<br>Lutikizumab vs<br>Placebo* |
|-----------------------------------------------------------------|---------|---------------------|-------------|---------------------|--------------------------------------------------------------|---------------------------------------|
|                                                                 | n       | LS Mean<br>(95% CI) | n           | LS Mean<br>(95% CI) |                                                              |                                       |
| AUSCAN stiffness NRS-11, 0–10)                                  | 60      | -1.9 (-3.0, -0.8)   | 50          | -2.7 (-3.7, -1.6)   | -0.8 (-1.6, 0.1)                                             | 0.07                                  |
| Subject assessment of pain intensity, index hand (NRS-11, 0–10) | 60      | -2.0 (-3.1, -0.9)   | 50          | -2.5 (-3.6, -1.4)   | -0.5 (-1.4, 0.4)                                             | 0.27                                  |
| PGA (NRS-11, 0–10)                                              | 60      | -2.0 (-3.1, -0.9)   | 50          | -2.4 (-3.5, -1.2)   | -0.4 (-1.3, 0.6)                                             | 0.45                                  |
| Grip strength, index hand, kg                                   | 61      | 2.1 (-1.6, 5.9)     | 52          | 3.0 (-0.9, 6.9)     | 0.9 (-2.6, 4.4)                                              | 0.63                                  |
| SF-36 (0–100)                                                   | 60      |                     | 51          |                     |                                                              |                                       |
| Physical Component Summary                                      |         | 1.85 (-1.10, 4.79)  |             | 3.49 (0.65, 6.33)   | 1.7 (-0.7, 4.0)                                              | 0.17                                  |
| Mental Component Summary                                        |         | -0.17 (-3.55, 3.20) |             | 0.40 (-2.97, 3.77)  | 0.6 (-2.1, 3.2)                                              | 0.67                                  |
| PROMIS SF20a (0–100)                                            | 60      | 1.6 (-0.7, 3.9)     | 50          | 2.6 (0.3, 4.8)      | 1.0 (-0.8, 2.9)                                              | 0.28                                  |
| MHQ, index hand total score (0–100)                             | 60      | 14.4 (7.2, 21.5)    | 51          | 16.0 (8.9, 23.0)    | 1.6 (-4.1, 7.3)                                              | 0.58                                  |
| Hand function                                                   |         | 14.6 (6.7, 22.4)    |             | 14.3 (6.6, 22.0)    | -0.3 (-6.5, 6.0)                                             | 0.93                                  |
| Activities of daily living                                      |         | 13.7 (5.0, 22.4)    |             | 13.8 (5.4, 22.2)    | 0.1 (-6.8, 7.0)                                              | 0.97                                  |
| Pain                                                            |         | -18.9 (-28.1,       |             | -23.6 (-32.6, -     | -4.7 (-12.0, 2.6)                                            | 0.20                                  |

|                                 |    |                 |                  |                   |                   |      |
|---------------------------------|----|-----------------|------------------|-------------------|-------------------|------|
|                                 |    |                 | -9.6)            | 14.5)             |                   |      |
| Work performance                |    |                 | 10.5 (0.2, 20.9) | 15.9 (5.7, 26.0)  | 5.3 (-3.0, 13.6)  | 0.21 |
| Aesthetics                      |    |                 | 10.8 (2.2, 19.4) | 6.2 (-2.3, 14.6)  | -4.7 (-11.5, 2.2) | 0.18 |
| Satisfaction with hand function |    |                 | 17.1 (6.8, 27.3) | 22.2 (12.2, 32.2) | 5.1 (-3.0, 13.2)  | 0.21 |
| FIHOA                           | 60 | 0.3 (-1.7, 2.3) | 51               | -0.8 (-2.8, 1.2)  | -1.1 (-2.7, 0.6)  | 0.20 |

---

ANCOVA=analysis of covariance; AUSCAN=Australian/Canadian Osteoarthritis Hand Index; FIHOA, Functional Index for Hand Osteoarthritis; LS=least squares; MHQ=Michigan Hand Outcomes Questionnaire; NRS=numeric rating scale; PGA=patient global assessment of hand osteoarthritis status; PROMIS SF20a=Patient Reported Outcomes Measurement Information System Physical Function Questionnaire; SF-36=36-item short-form health survey.

\**P* values are from an ANCOVA model adjusted for treatment groups and country as factors, and including baseline value as a covariate.
